# Supplementary material for: Exploring U.S. Shifts in Anti-Asian Sentiment with the Emergence of COVID-19
Source: MDPI journal article supplement (doi:10.3390/ijerph17197032), 2020-09-25
Supplement: s1 [file s1]

## Online Supplementary Materials

### Figures S1 – S5, Tables S1

**Figure S1.** Temporal changes in negative Black sentiment, November 2019 – April 2020

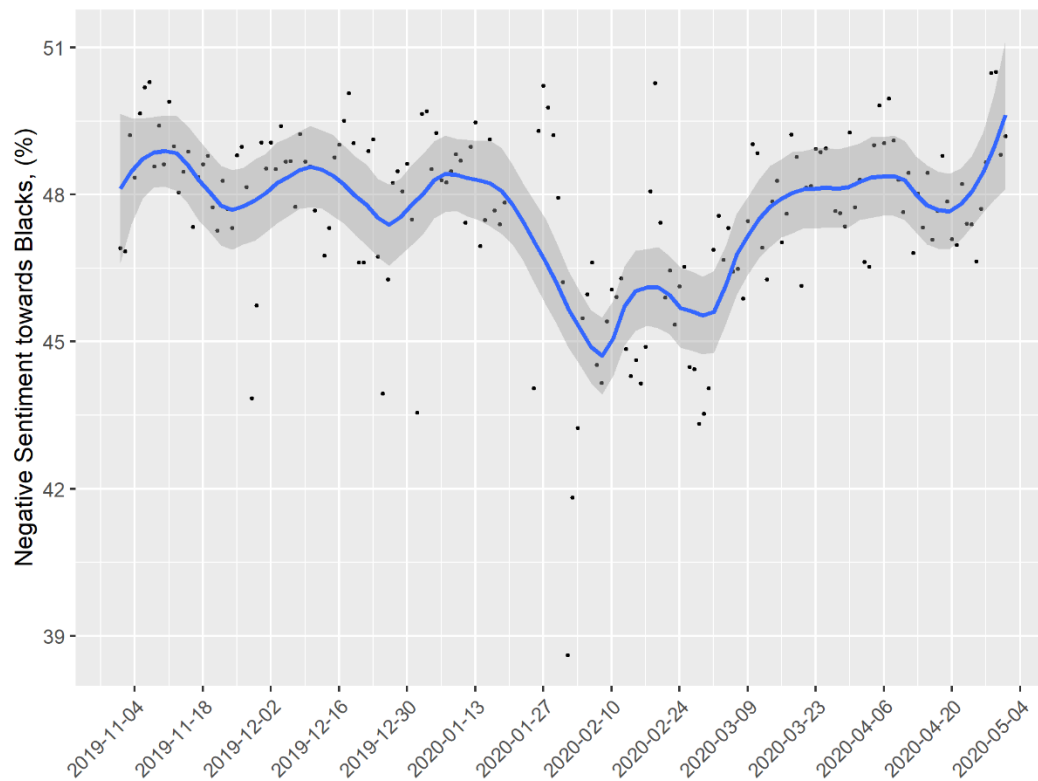

N=1,714,913 tweets. LOESS (locally estimated scatterplot smoothing) was performed to fit smooth curves to daily prevalence of negative sentiment. The shaded area represents 95% confidence bands around the smoothed trend line.

**Figure S2.** Temporal changes in negative Latinx sentiment, November 2019 – April 2020

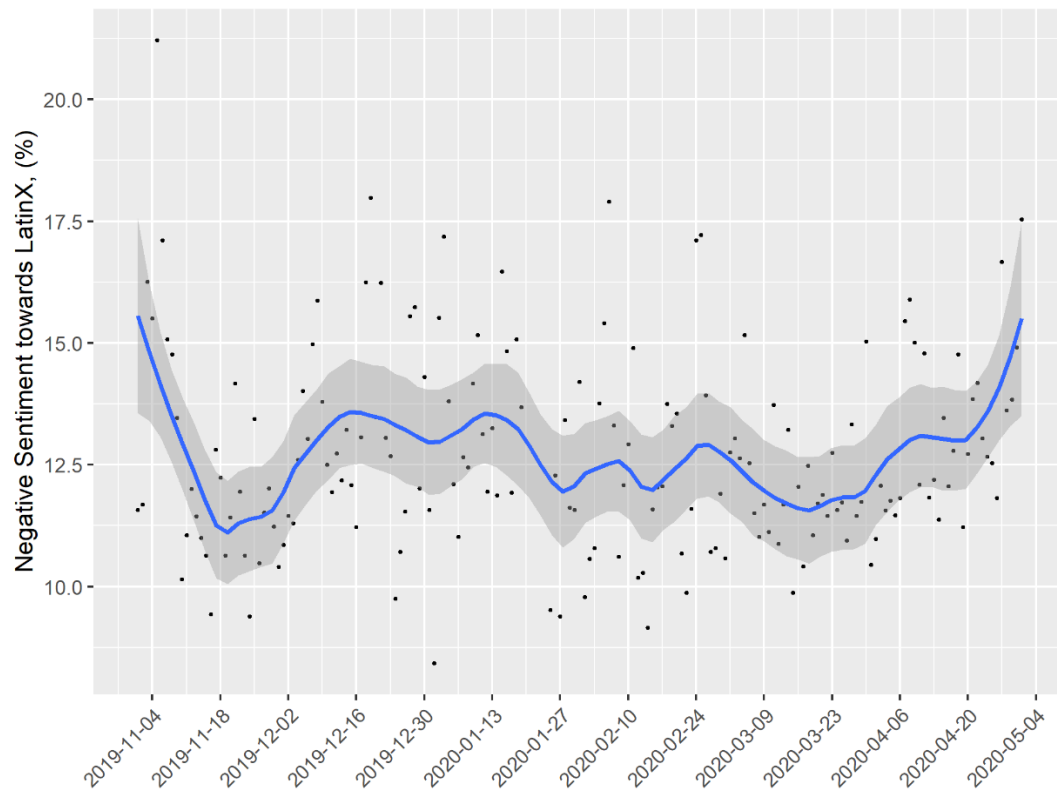

N=161,651 tweets. LOESS (locally estimated scatterplot smoothing) was performed to fit smooth curves to daily prevalence of negative sentiment. The shaded area represents 95% confidence bands around the smoothed trend line.

**Figure S3.** Temporal changes in negative Asian sentiment by state

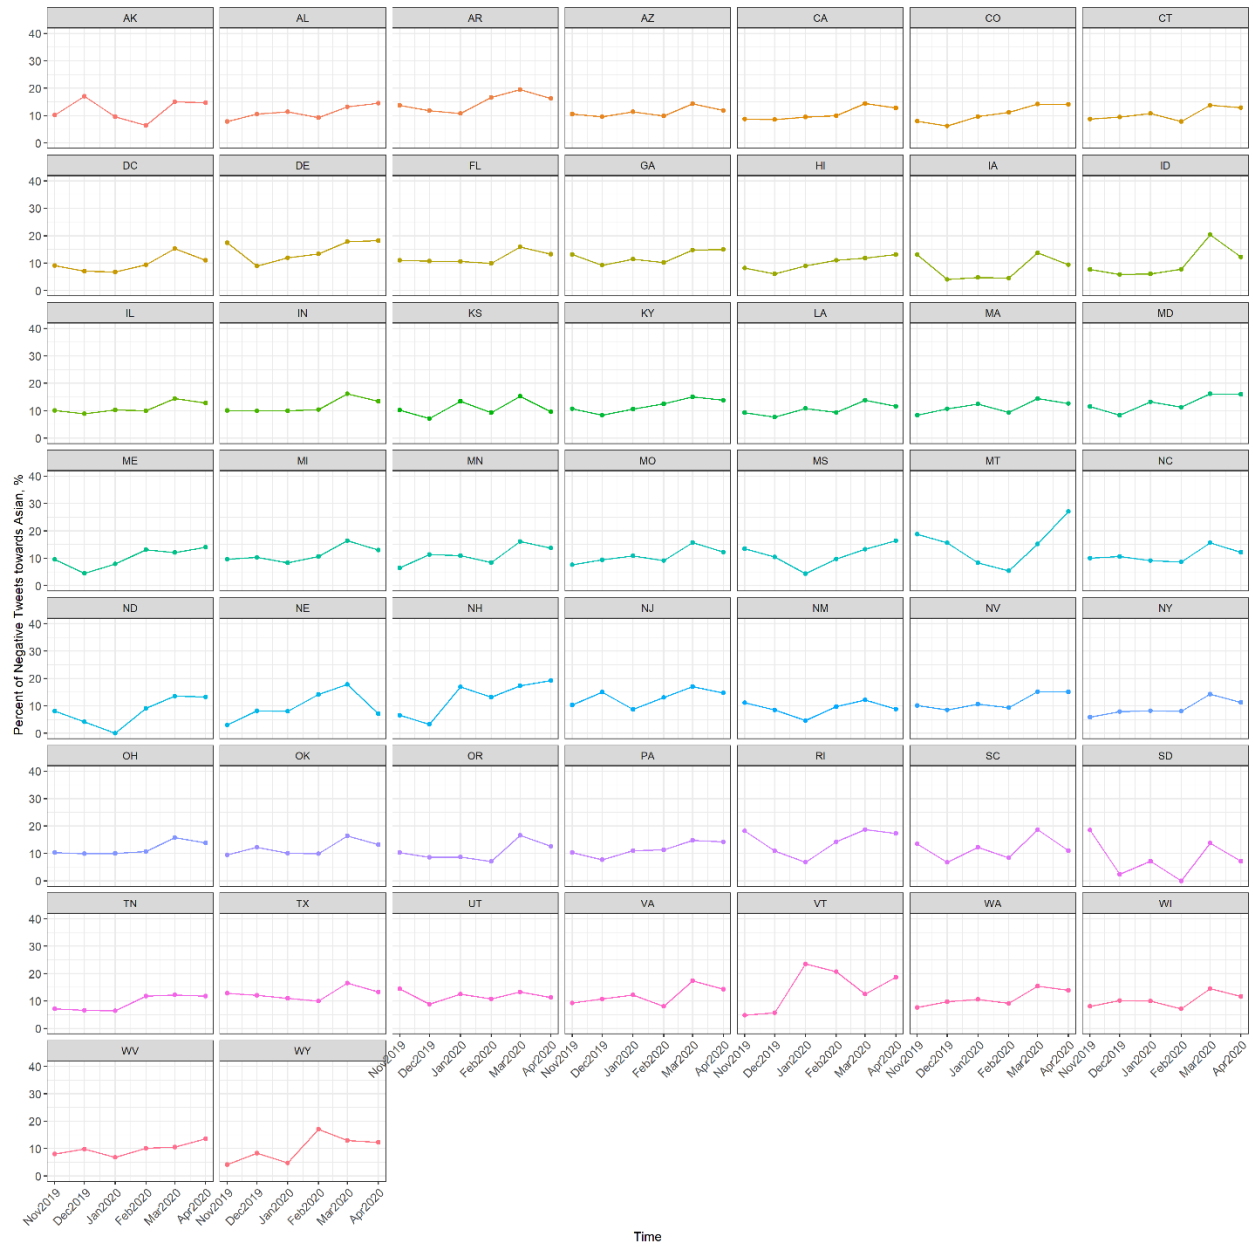

**Figure S4.** Temporal changes in positive Asian sentiment by state

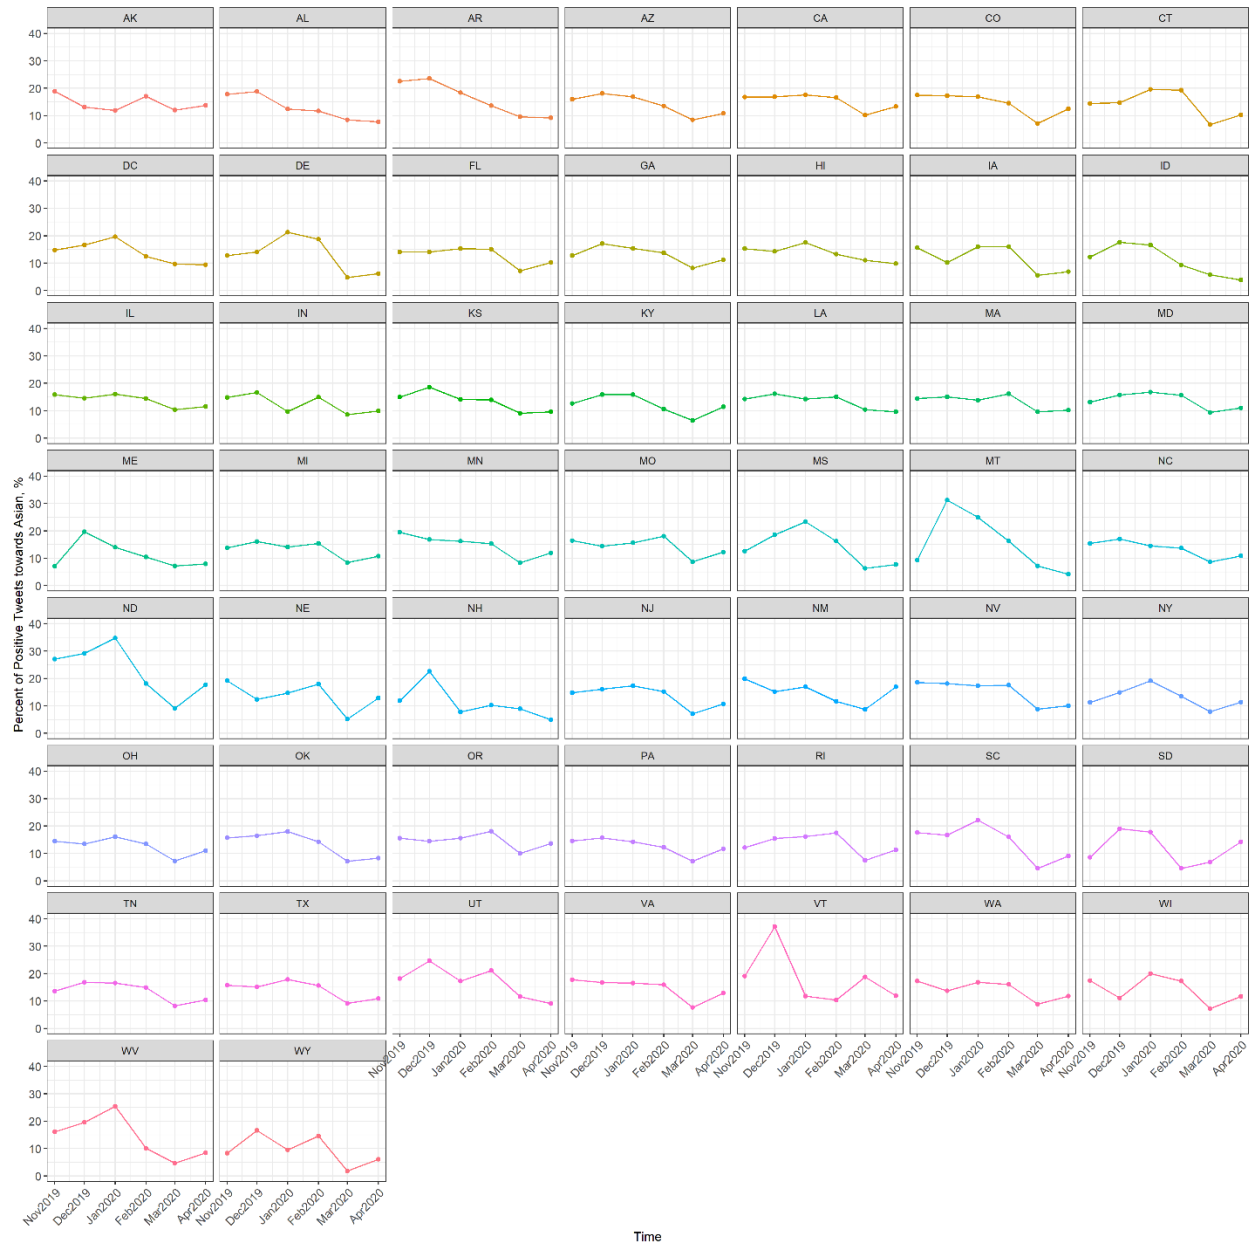

**Figure S5.** Temporal trends in Google Searches of “wuhan virus” and “china virus”

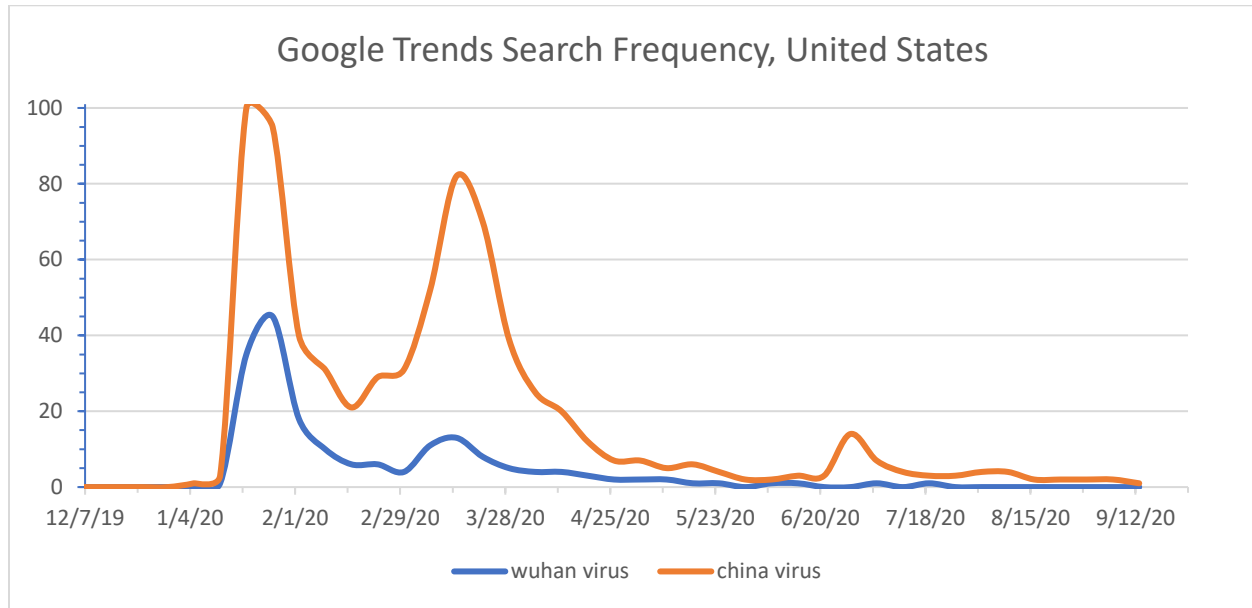

**Table S1.** Percent negative tweets using Asian and Chinese-related keywords by month, November 2019-June 2020.

|                     | November         | December         | January          | February         | March             | April             | May               | June              |
|---------------------|------------------|------------------|------------------|------------------|-------------------|-------------------|-------------------|-------------------|
| Racial/ethnic group | % (N)            | % (N)            | % (N)            | % (N)            | % (N)             | % (N)             | % (N)             | % (N)             |
| Asian               | 9.45<br>(31,774) | 9.34<br>(30,476) | 9.96<br>(27,588) | 9.81<br>(32,925) | 15.21<br>(65,915) | 13.11<br>(46,585) | 12.02<br>(40,356) | 13.41<br>(30,150) |
| Chinese             | 5.82<br>(9,558)  | 6.78<br>(9,277)  | 8.20<br>(8,857)  | 8.89<br>(10,834) | 15.75<br>(37,780) | 13.17<br>(23,279) | 11.42<br>(14,952) | 11.11<br>(9,797)  |

Percentages refer to percent of tweets in each racial/ethnic category that are negative. N refer to the total number of tweets for that racial/ethnic category for that month.
